# Supplementary material for: On the structural evolution of nanoporous optically transparent CuO photocathodes upon calcination for photoelectrochemical applications
Source: Royal Society of Chemistry journal article supplement (doi:10.1039/d4na00199k), 2024-01-01
Supplement: d4na00199k1.pdf [file d4na00199k1.pdf]

Supporting Information to

# **On the Structural Evolution of Nanoporous Optically Transparent CuO Photocathodes upon Calcination for Photoelectrochemical Applications**

Lukas Korell,<sup>1</sup> Stefan Lauterbach,<sup>2</sup> Jana Timm,<sup>3</sup> Li Wang,<sup>4</sup> Maximilian Mellin,<sup>1</sup> Anna Kundmann,<sup>4</sup>  
Qingyang Wu,<sup>1</sup> Chuanmu Tian,<sup>1</sup> Roland Marschall,<sup>3</sup> Jan P. Hofmann,<sup>1</sup> Frank E. Osterloh,<sup>4</sup> and Marcus  
Einert\*,<sup>1</sup>

<sup>1</sup>Surface Science Laboratory, Department of Materials and Earth Sciences, Technical University of  
Darmstadt, Otto-Berndt-Straße 3, 64287 Darmstadt, Germany

<sup>2</sup>Institute for Applied Geosciences, Geomaterial Science, Technical University of Darmstadt,  
Schnittspahnstraße 9, 64287 Darmstadt, Germany

<sup>3</sup>Department of Chemistry, University of Bayreuth, Universitätsstraße 30, 95447 Bayreuth, Germany

<sup>4</sup>Department of Chemistry, University of California, One Shields Avenue, Davis, CA 95616, USA

corresponding author:

M. Einert – meinert@surface.tu-darmstadt.de

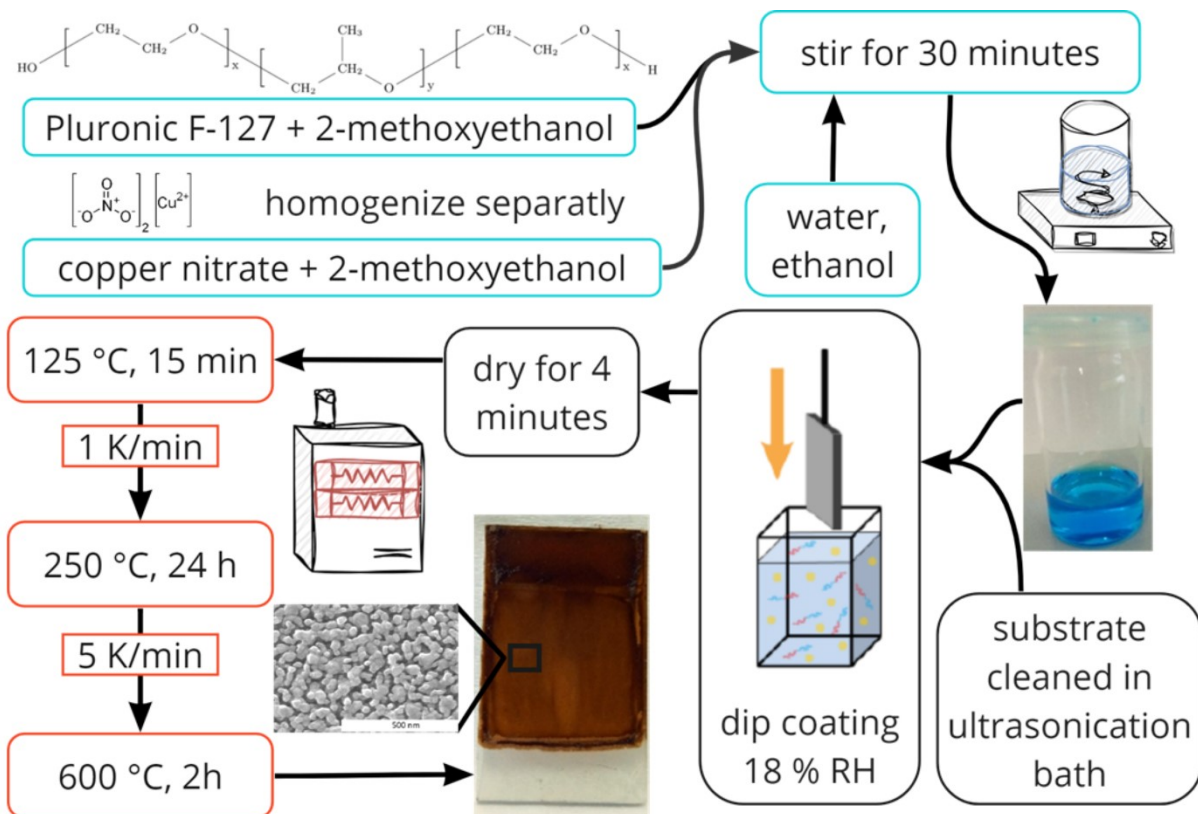

**Figure S1.** Flow chart representing the novel synthesis route starting from dissolution of the precursors over the dip-coating process to the applied temperature profile for the preparation of nanocrystalline and nanoporous CuO thin films.

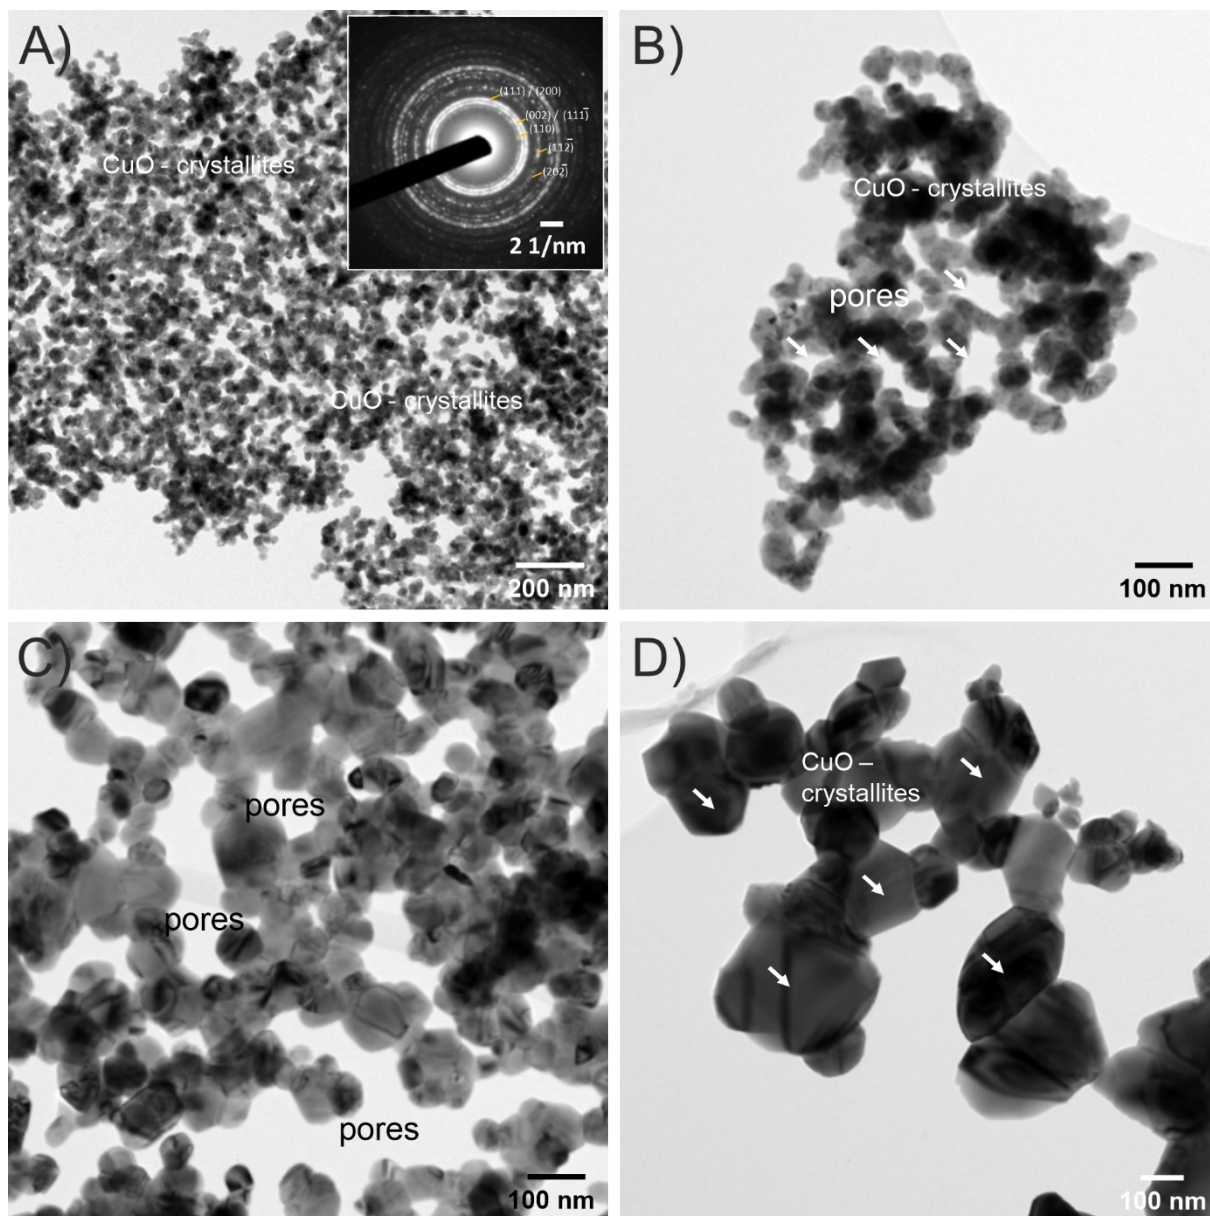

**Figure S2.** Bright-field TEM images of A) CuO-400, B) CuO-500, C) CuO-600, and D) CuO-750. Arrows indicating CuO crystallites and areas representing the pores. The inset in A) shows a SAED pattern of the area. The pattern is indexed applying the crystallographic data for monoclinic CuO.

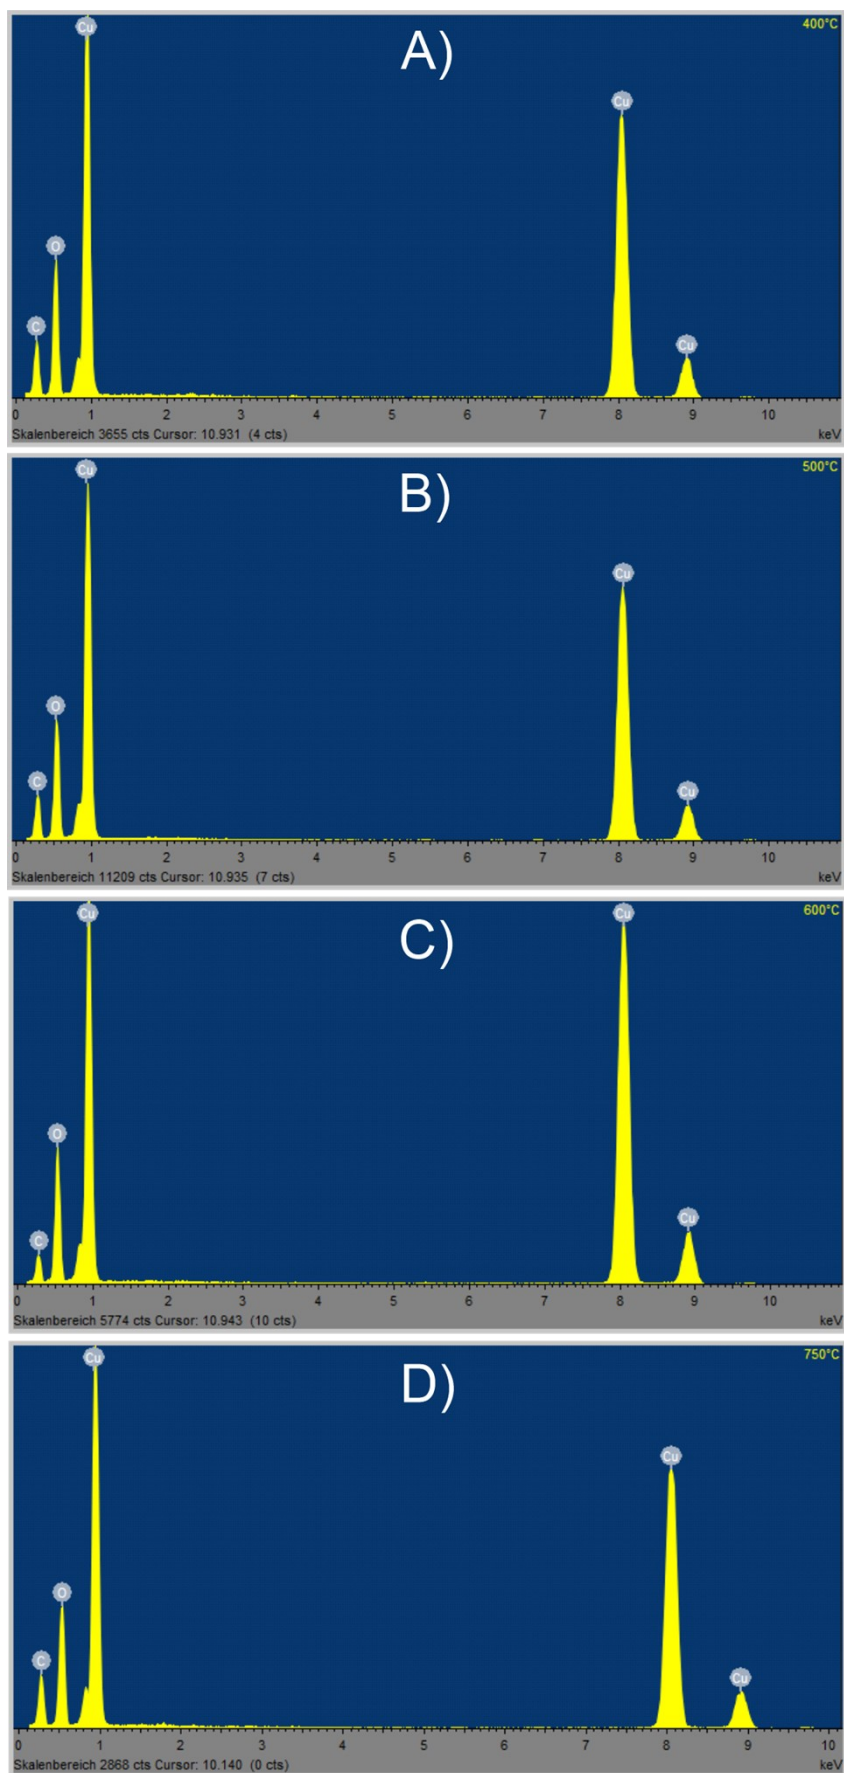

**Figure S3.** Energy dispersive X-ray spectroscopy (EDS) applied for A) CuO-400, B) CuO-500, C) CuO-600, and D) CuO-750 presenting the detected signals of Cu, O, and C.

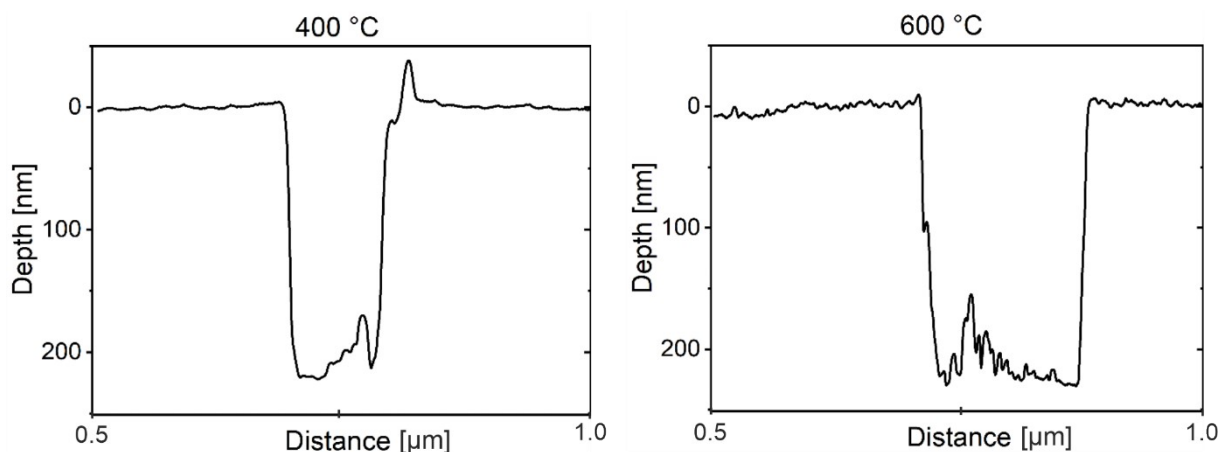

**Figure S4.** Representative profilometry measurements of mesoporous CuO-400 (left) and CuO-600 (right) thin films.

**Table S1:** Crystallite sizes and full width at half maximum (FWHM) values of CuO thin films calcinated at four different temperatures and calculated by Williamson-Hall method.

| Calcination temperature                   | 400 °C                  | 500 °C                  | 600 °C                  | 750 °C                  |
|-------------------------------------------|-------------------------|-------------------------|-------------------------|-------------------------|
| $\Delta(2\theta)$ (110), (202), and (004) | 1.09°, 1.33°, and 1.61° | 0.88°, 1.17°, and 1.40° | 0.80°, 1.06°, and 1.23° | 0.82°, 0.94°, and 1.29° |
| Crystallite size                          | 8.9 nm                  | 11.9 nm                 | 12.2 nm                 | 13.7 nm                 |

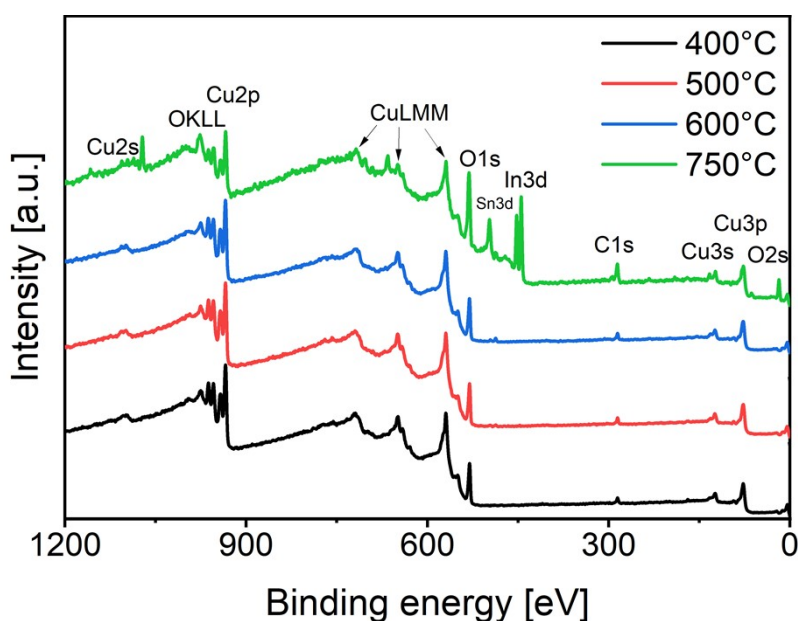

**Figure S5.** XPS survey spectrum of the mesoporous CuO-400, CuO-500, CuO-600, and CuO-750 thin films. The additional In3d and Sn3d emission lines for CuO-750 originate from the ITO substrate.

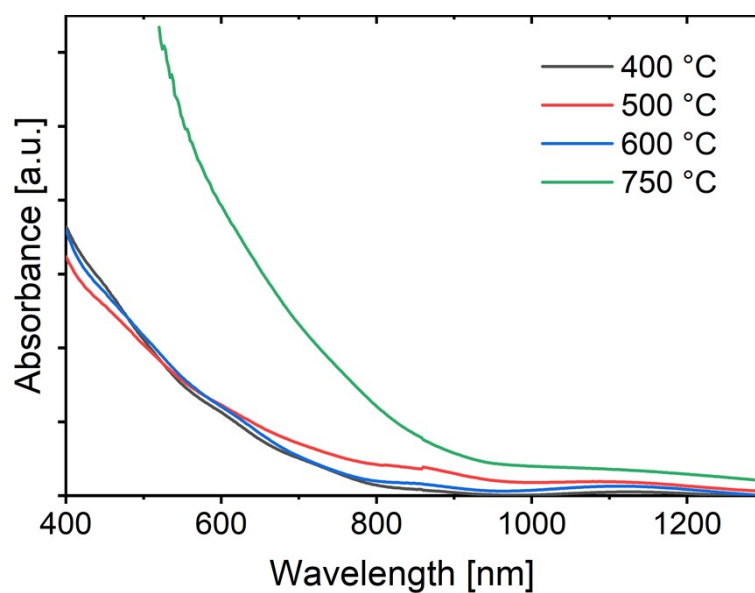

**Figure S6.** Absorbance spectra of the mesoporous CuO-400, CuO-500, CuO-600, and CuO-750 thin films measured in transmission mode.

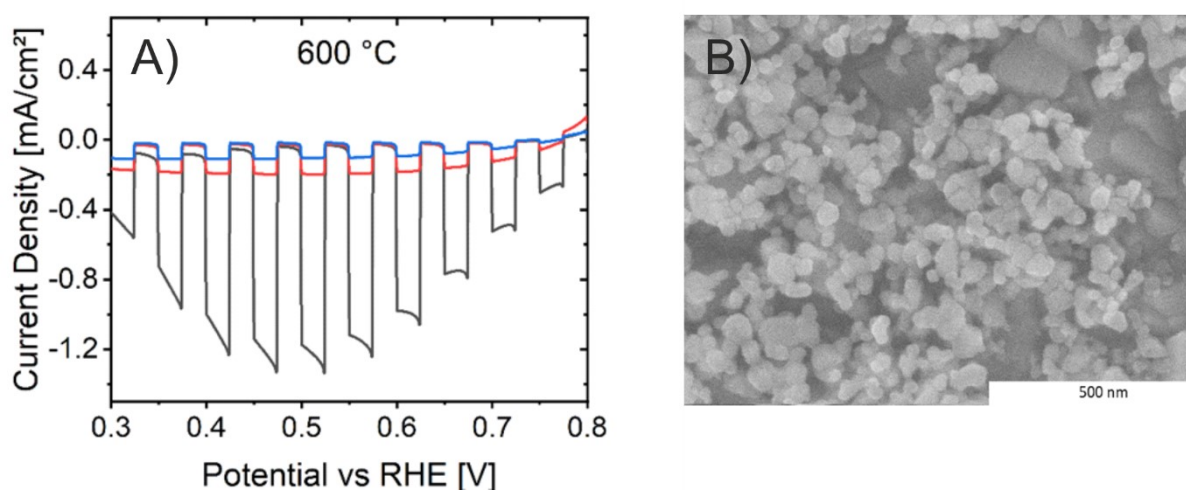

**Figure S7.** A) Intermittent-light voltammetry for three consecutive measurements at CuO-600 (black 1<sup>st</sup>, red 2<sup>nd</sup>, and blue 3<sup>rd</sup> cycle). B) SEM picture of CuO-600 sample after photoelectrochemical characterization (i.e., subsequential chopped-light voltammetry and Mott-Schottky analysis).

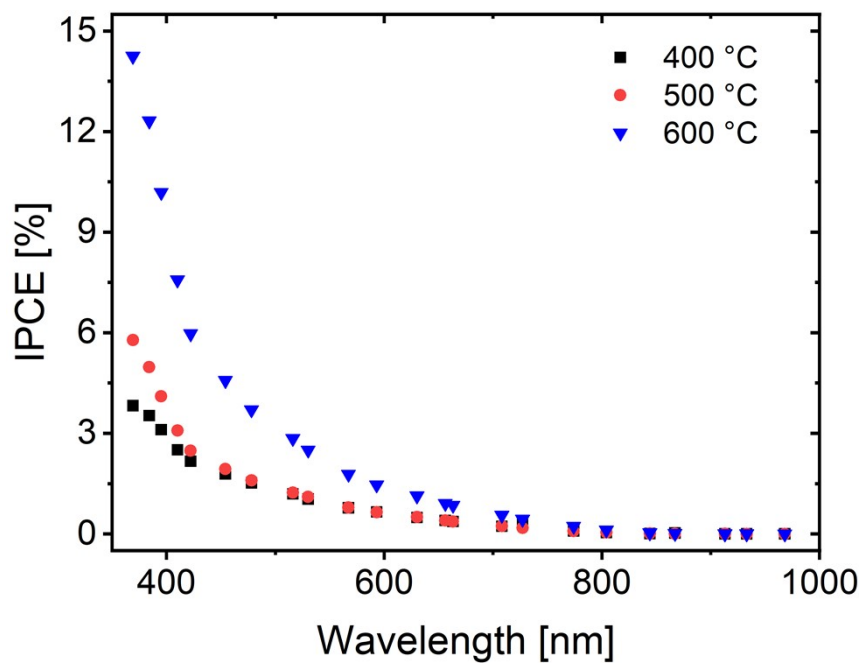

**Figure S8.** IPCE spectra of CuO-400, CuO-500, and CuO-600 thin films measured at 400 mV vs. RHE in 1.0 M Na<sub>2</sub>SO<sub>3</sub> / 0.2 M Na<sub>2</sub>SO<sub>4</sub> electrolyte.

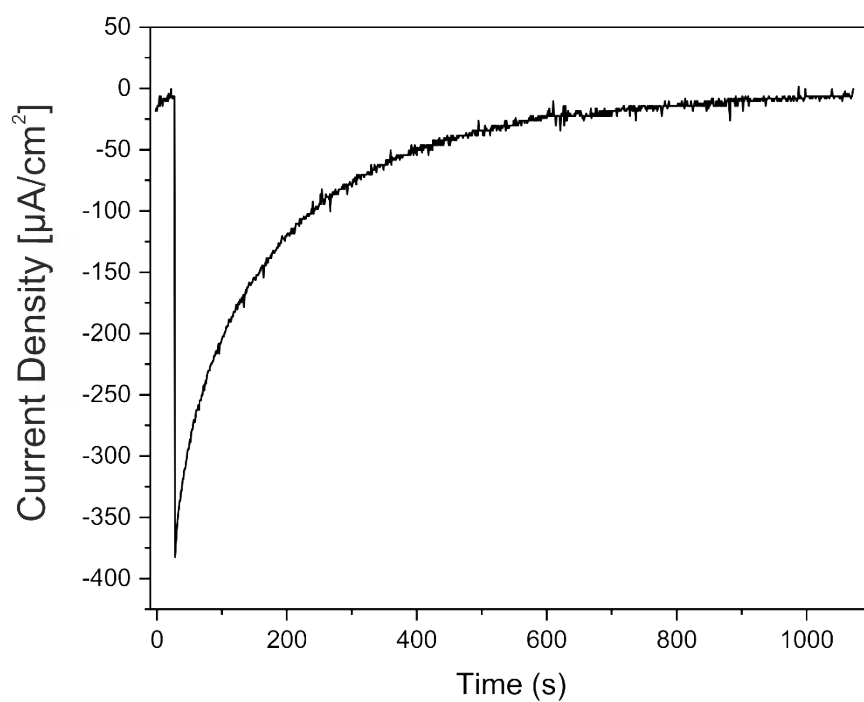

**Figure S9.** Photocurrent decay curve for CuO thin film in 1.0 M Na<sub>2</sub>SO<sub>3</sub> / 0.2 M Na<sub>2</sub>SO<sub>4</sub> electrolyte under AM 1.5 irradiation and at 0.3 V vs RHE.

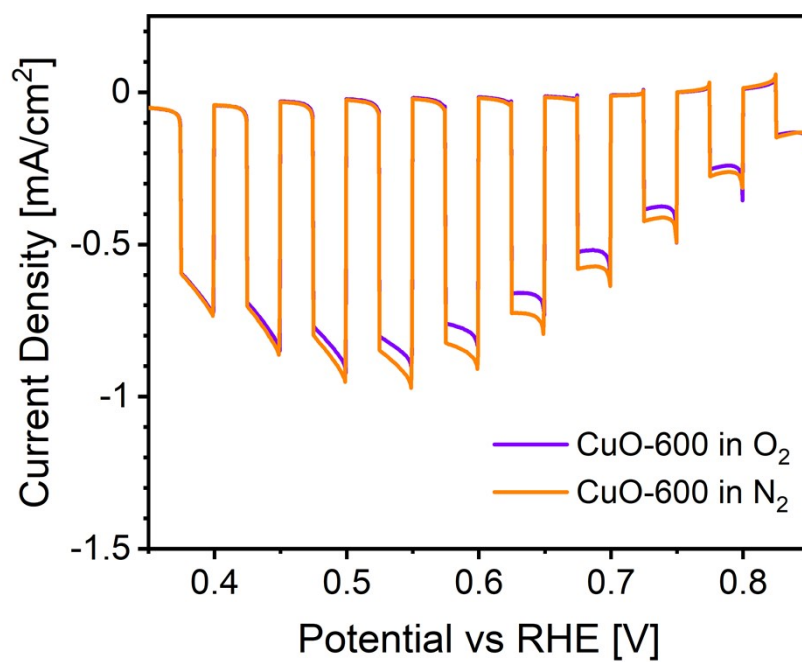

**Figure S10.** Intermittent-light voltammetry for CuO-600 thin films analyzed in oxygen (violet) and nitrogen (orange) purged aqueous 0.2 M Na<sub>2</sub>SO<sub>4</sub> electrolyte (containing a phosphate buffer and 1 M Na<sub>2</sub>SO<sub>3</sub>).



**Table S2:** Wavelengths, full width at half maximum (FWHM), and power of the LEDs accessed in the tunable light source.

| Wavelength [nm] | FWHM [nm] | P [ $\text{Wm}^{-2}$ ] |
|-----------------|-----------|------------------------|
| 1008            | 44        | 139                    |
| 968             | 35        | 98                     |
| 933             | 46        | 114                    |
| 913             | 37        | 153                    |
| 867             | 32        | 221                    |
| 844             | 25        | 221                    |
| 804             | 23        | 222                    |
| 774             | 22        | 201                    |
| 727             | 20        | 214                    |
| 708             | 21        | 269                    |
| 663             | 17        | 132                    |
| 656             | 56        | 322                    |
| 630             | 14        | 544                    |
| 593             | 12        | 184                    |
| 567             | 63        | 689                    |
| 530             | 22        | 450                    |
| 516             | 22        | 519                    |
| 478             | 15        | 811                    |
| 454             | 13        | 958                    |
| 422             | 10        | 946                    |
| 410             | 15        | 797                    |
| 395             | 10        | 390                    |
| 384             | 8         | 408                    |
| 369             | 8         | 293                    |

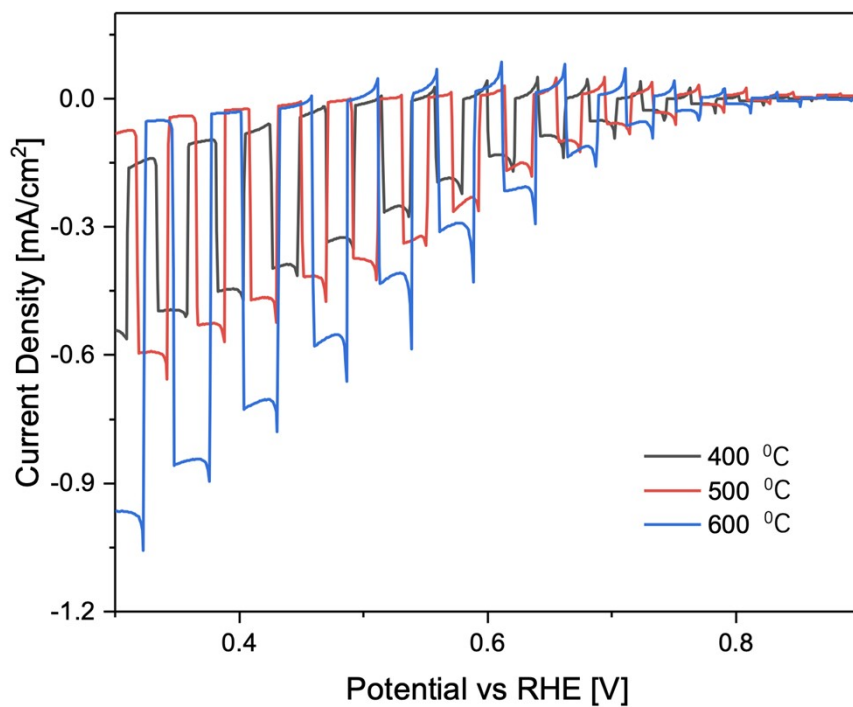

**Figure S11.** Linear sweep voltammetry (LSV) scans under chopped illumination (AM 1.5) for CuO-400, CuO-500 and CuO-600 photocathodes in 0.01 M MVCl<sub>2</sub>/0.05 M sodium phosphate buffer (pH = 7) with continuous N<sub>2</sub> bubbling.

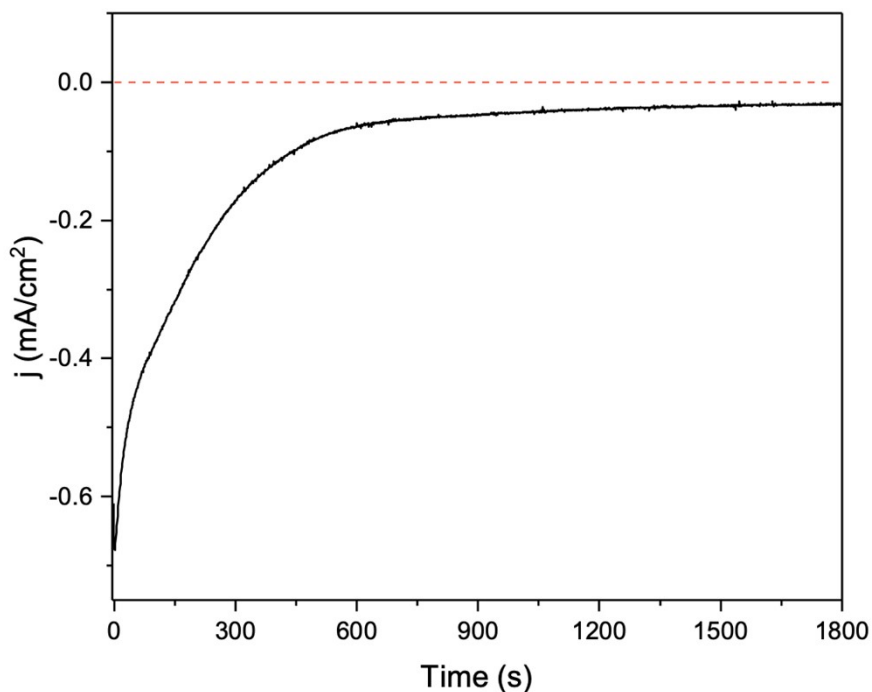

**Figure S12.** Photocurrent decay curve for CuO-600 thin film under AM 1.5 Illumination at 0.4 V vs. RHE in 0.01 M MVCl<sub>2</sub>/ 0.05 M sodium phosphate buffer (pH = 7) with continuous N<sub>2</sub> bubbling.

**Table S3.** Average film thickness determined by measuring three different spots on the CuO thin films composed of 1, 2, 3, 4, and 5 layers.

| Number of layers | 1        | 2        | 3        | 4        | 5        |
|------------------|----------|----------|----------|----------|----------|
| Thickness [nm]   | 170 ± 20 | 300 ± 20 | 380 ± 20 | 430 ± 20 | 490 ± 20 |

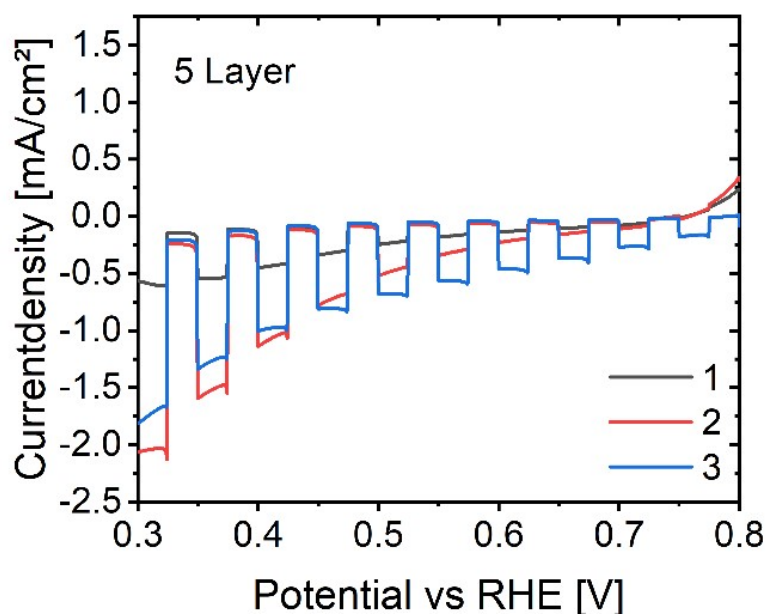

**Figure S13.** Three consecutive CLV measurements conducted on a five-layered CuO-600 sample.

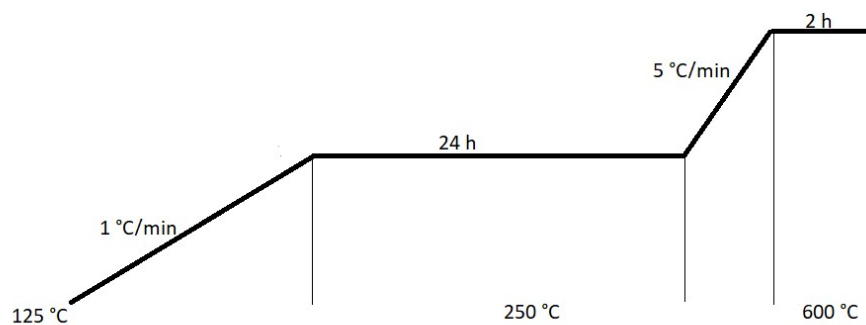

**Figure S14.** Heating protocol for the preparation of mesoporous CuO thin films calcinated at 600 °C.
